# Supplementary material for: Design of Multi-Epitope Vaccine for Staphylococcus saprophyticus: Pan-Genome and Reverse Vaccinology Approach
Source: MDPI journal article supplement (doi:10.3390/vaccines10081192), 2022-07-27
Supplement: s1 [file s1]

**Supplementary File:**

**Table S1. Details of *Staphylococcus saprophyticus* species selected for Pan-genome analysis.**

| Organism name                           | No. of core genes | No. of accessory genes | No. of unique genes | No. of exclusively absent genes |
|-----------------------------------------|-------------------|------------------------|---------------------|---------------------------------|
| GCF_000010125.1_ASM1012v1_protein.faa   | 2049              | 231                    | 24                  | 8                               |
| GCF_006094355.1_ASM609435v1_protein.faa | 2049              | 222                    | 22                  | 17                              |
| GCF_007814115.1_ASM781411v1_protein.faa | 2049              | 205                    | 126                 | 27                              |
| GCF_900240075.1_883_protein.faa         | 2049              | 170                    | 21                  | 41                              |
| GCF_900635295.1_40853_E01_protein.faa   | 2049              | 218                    | 61                  | 16                              |

**Table S2. List of Amino acid pairs selected for disulfide engineering.**

| Residue 1 | Residue 2 | Bond Chi value ( $\chi^3$ ) | Bond Energy (kcal/mol) | B- factor |
|-----------|-----------|-----------------------------|------------------------|-----------|
| Lys 26    | Glu 33    | +93.11                      | 0.43                   | 0.00      |
| Glu 29    | Phe 32    | +119.27                     | 4.35                   | 0.00      |
| Ala 41    | Ala 48    | -98.11                      | 3.83                   | 0.00      |
| Ile 66    | Gly 76    | +77.71                      | 4.05                   | 0.00      |
| Ala 69    | Asp 72    | +123.90                     | 3.41                   | 0.00      |
| Arg 82    | Gly 89    | +79.96                      | 3.77                   | 0.00      |
| Ala 93    | Ala 100   | -106.86                     | 2.02                   | 0.00      |
| Lys 164   | Ser 167   | +111.18                     | 4.49                   | 0.00      |
| Met 174   | Lys 177   | +124.33                     | 2.90                   | 0.00      |
| Ala 182   | Ala 229   | +89.96                      | 1.60                   | 0.00      |
| Tyr 183   | Pro 188   | +94.91                      | 2.42                   | 0.00      |
| Ala 194   | Ser 202   | +91.46                      | 4.26                   | 0.00      |
| Asn 198   | Gly 201   | +79.63                      | 2.84                   | 0.00      |
| Ala 206   | Ser 223   | -92.52                      | 3.13                   | 0.00      |
| Asn 215   | Ala 218   | +94.97                      | 2.08                   | 0.00      |
| Ser 234   | Asn 240   | +120.89                     | 3.42                   | 0.00      |
| Asp 259   | Lys 262   | +116.67                     | 2.49                   | 0.00      |

**Table S3. Sequences of B cell epitopes.**

| <b>Protein</b>                 | <b>B cell peptide</b>                                                                                                                                                                                                                                                                | <b>Start</b> | <b>End</b> |
|--------------------------------|--------------------------------------------------------------------------------------------------------------------------------------------------------------------------------------------------------------------------------------------------------------------------------------|--------------|------------|
| >core/2532/1/Org1_<br>Gene366  | CGKDDEKASLEKDIDKLEKQNKDLKKQKEKLE<br>KEQDKLKDKSDDLEKDI                                                                                                                                                                                                                                | 18           | 66         |
| >core/2498/3/Org3_<br>Gene1992 | SKFEQVKGNVKETAGNVMDNKNKLEQEGKEDK<br>ASGKAKEVTE                                                                                                                                                                                                                                       | 5            | 45         |
| >core/1222/1/Org1_<br>Gene818  | TLSLALAACSNGSDDDDSSKKDDSSKDNQSSDD<br>KSKDSKNDDKKNNDSDKDKDNNSDSDKNSDS<br>KSDDSSSSDRNNGDDENSSDNASGSDSSSSNND<br>SNANS DGSSSNADGDNASGNNDNANNATSSSES<br>NGNENGAMNDANGSNSNDNASADANN GASSA<br>NTSQYVAPYQGQNAV PVAQNITSGTPDSQAAL<br>QNLPNFQNALDNATTEVNGLNGQSNPYNDYAI<br>EGSEGNYSYIFS FQNAQPG | 10           | 252        |
